# Supplementary material for: Genome-wide association study identified genes associated with ammonia nitrogen tolerance in Litopenaeus vannamei
Source: Front Genet. 2022 Aug 22;13:961009. doi: 10.3389/fgene.2022.961009 (PMC9441690; doi:10.3389/fgene.2022.961009)
Supplement: Supplementary file 1 [file DataSheet1.xlsx]

## Sheet: FramCPU
SNP	SEQ	P-value	MAF
NW_020872338.1_225382	7	1.25e-10	0.225
NW_020872541.1_863289	8	9.91e-09	0.0458333
NW_020870327.1_88337	5	1.13e-06	0.258333
NW_020869294.1_73973	3	1.69e-05	0.15
NW_020869526.1_279287	3	4.87e-05	0.0333333
NW_020869858.1_1385529	4	7.72e-05	0.0708333
NW_020869444.1_239148	3	8.36e-05	0.325
NW_020869735.1_187936	3	0.000124594	0.316667
NW_020869181.1_527302	2	0.000130955	0.133333
NW_020868306.1_20334	1	0.000154573	0.0333333
NW_020870172.1_202644	4	0.000213265	0.1
NW_020870873.1_876746	6	0.00023255	0.445833
NW_020869032.1_863364	2	0.000418752	0.0958333
NW_020871290.1_40285	6	0.000486234	0.0708333
NW_020870605.1_209482	5	0.0005348	0.133333
NW_020868760.1_947116	1	0.000557443	0.166667
NW_020869463.1_706984	3	0.000571028	0.225
NW_020872031.1_47395	7	0.000576264	0.0125
NW_020870172.1_193652	4	0.000612567	0.329167
NW_020869670.1_133336	3	0.00074892	0.15
NW_020872523.1_67744	8	0.000772644	0.170833
NW_020868457.1_56949	1	0.000783859	0.0916667
NW_020869855.1_275485	4	0.000915378	0.0375
NW_020872555.1_337673	8	0.00109831	0.0583333
NW_020870068.1_189949	4	0.00111127	0.404167
NW_020869105.1_225000	2	0.00113327	0.1625
NW_020869450.1_41675	3	0.0012252	0.441667
NW_020869899.1_550452	4	0.00128594	0.158333
NW_020868789.1_182467	1	0.00133369	0.229167
NW_020868874.1_44900	2	0.00134564	0.0666667
NW_020871887.1_21854	7	0.00141228	0.05
NW_020872840.1_634586	9	0.00147283	0.358333
NW_020872808.1_285640	9	0.00148133	0.0625
NW_020869121.1_571587	2	0.00184822	0.2125
NW_020871267.1_118663	6	0.00186565	0.0416667
NW_020871421.1_173705	6	0.00187661	0.0541667
NW_020870373.1_284397	5	0.0019042	0.245833
NW_020869259.1_508047	2	0.00194754	0.104167
NW_020872855.1_309331	9	0.00199063	0.125
NW_020869641.1_96059	3	0.0019918	0.0583333
NW_020870208.1_160758	4	0.00202185	0.0375
NW_020870106.1_844948	4	0.00212093	0.0833333
NW_020872788.1_311036	9	0.00213372	0.241667
NW_020869483.1_182241	3	0.00215855	0.170833
NW_020872236.1_359889	7	0.00223173	0.1125
NW_020871074.1_126818	6	0.0022422	0.170833
NW_020871044.1_549440	6	0.0022784	0.2
NW_020869568.1_156751	3	0.00229437	0.229167
NW_020870530.1_512308	5	0.00229676	0.1125
NW_020869105.1_57190	2	0.00234014	0.0125
NW_020872590.1_118311	8	0.00235008	0.133333
NW_020869406.1_368789	3	0.00258435	0.208333
NW_020868970.1_244467	2	0.00258946	0.1125
NW_020871232.1_259505	6	0.00262112	0.104167
NW_020871134.1_733449	6	0.00263674	0.1
NW_020871382.1_302704	6	0.00263878	0.108333
NW_020870048.1_136137	4	0.00266318	0.279167
NW_020870244.1_34537	4	0.00271239	0.116667
NW_020868602.1_604003	1	0.00279226	0.0916667
NW_020870492.1_724964	5	0.00282881	0.45
NW_020868886.1_1206267	2	0.0028594	0.145833
NW_020871219.1_520748	6	0.00289727	0.1625
NW_020869858.1_1068234	4	0.00291553	0.225
NW_020871968.1_163019	7	0.00292624	0.154167
NW_020869095.1_76339	2	0.00293243	0.245833
NW_020871222.1_32623	6	0.0029389	0.15
NW_020869572.1_533608	3	0.00297986	0.075
NW_020869833.1_393745	4	0.00298127	0.408333
NW_020868718.1_895759	1	0.00298372	0.170833
NW_020869105.1_43291	2	0.00311188	0.0125
NW_020869010.1_166844	2	0.00319729	0.1625
NW_020870173.1_1236719	4	0.00322188	0.283333
NW_020869885.1_678612	4	0.00324442	0.104167
NW_020869095.1_109713	2	0.00329118	0.158333
NW_020872958.1_1030219	9	0.00329429	0.225
NW_020872507.1_826940	7	0.00329584	0.291667
NW_020869262.1_2357431	2	0.00332379	0.458333
NW_020871839.1_277717	7	0.00342553	0.0625
NW_020869248.1_192844	2	0.00343829	0.0708333
NW_020870994.1_296302	6	0.00345307	0.141667
NW_020868966.1_1115422	2	0.00347886	0.283333
NW_020870125.1_933586	4	0.00348868	0.3625
NW_020872064.1_69446	7	0.00351756	0.0708333
NW_020868458.1_514620	1	0.00356342	0.141667
NW_020870307.1_733733	5	0.00371526	0.191667
NW_020868455.1_623670	1	0.00377438	0.05
c100894_g1_586	9	0.00382991	0.308333
NW_020869568.1_64242	3	0.00384853	0.333333
NW_020870626.1_87119	5	0.00385333	0.233333
NW_020871758.1_57012	6	0.00390919	0.3375
NW_020871340.1_599341	6	0.00395459	0.0666667
NW_020870151.1_171848	4	0.00401506	0.391667
NW_020871219.1_353006	6	0.00402188	0.0666667
NW_020870125.1_934379	4	0.00402814	0.358333
NW_020872800.1_149171	9	0.00407245	0.0958333
NW_020869246.1_462010	2	0.00408068	0.0791667
NW_020870911.1_1248571	6	0.00408148	0.125
NW_020870651.1_766447	5	0.00409708	0.175
NW_020870204.1_136108	4	0.00412461	0.208333
NW_020870761.1_1246905	5	0.00412715	0.233333
NW_020871102.1_224183	6	0.00414277	0.295833
NW_020869455.1_178855	3	0.00421855	0.05
NW_020872720.1_906352	9	0.00421861	0.25
NW_020869780.1_247107	3	0.00422885	0.0333333
NW_020868327.1_166864	1	0.00424808	0.0708333
NW_020869386.1_437205	3	0.00430777	0.3625
NW_020870739.1_405396	5	0.00434261	0.420833
NW_020869089.1_619340	2	0.00442951	0.0875
NW_020870533.1_1362353	5	0.00447346	0.270833
NW_020869876.1_227824	4	0.00454088	0.408333
NW_020870989.1_600365	6	0.00459359	0.0708333
NW_020870762.1_724168	5	0.0046053	0.370833
NW_020870944.1_334013	6	0.00463683	0.283333
NW_020869786.1_137151	3	0.00466348	0.175
NW_020869451.1_49152	3	0.00475408	0.220833
NW_020869309.1_255155	3	0.00482205	0.2375
NW_020872955.1_299159	9	0.00482432	0.1
NW_020869440.1_113071	3	0.00483694	0.104167
NW_020868690.1_194939	1	0.00494398	0.1
NW_020868718.1_140759	1	0.00495045	0.1625
NW_020868474.1_1152438	1	0.00496277	0.170833
c103251_g1_751	9	0.00496647	0.1375
NW_020871081.1_16233	6	0.00504202	0.0541667
NW_020869550.1_236966	3	0.00525802	0.229167
NW_020869670.1_168994	3	0.00528885	0.358333
NW_020872423.1_104832	7	0.00532905	0.333333
NW_020871255.1_298247	6	0.00543153	0.458333
NW_020868525.1_713467	1	0.00548075	0.454167
NW_020872306.1_412593	7	0.00548989	0.0541667
NW_020869089.1_297043	2	0.00551298	0.108333
NW_020872140.1_418999	7	0.00553023	0.3
NW_020870679.1_594445	5	0.00555346	0.0125
NW_020872601.1_894738	8	0.00557531	0.2375
NW_020872631.1_20930	8	0.00557861	0.0416667
NW_020869160.1_333938	2	0.00559415	0.483333
NW_020872964.1_275440	9	0.00559825	0.4625
NW_020868527.1_6935	1	0.00564002	0.408333
NW_020870955.1_305197	6	0.00567138	0.320833
NW_020872085.1_26535	7	0.00568531	0.125
NW_020870699.1_1362552	5	0.00577717	0.2375
NW_020869832.1_542525	4	0.00577824	0.129167
NW_020871915.1_1067269	7	0.00581536	0.075
NW_020870613.1_258368	5	0.00584	0.0416667
NW_020869746.1_141734	3	0.00586054	0.366667
NW_020870911.1_548271	6	0.00586308	0.0375
NW_020868806.1_7295	1	0.00587667	0.179167
NW_020868949.1_1227231	2	0.00588081	0.0416667
NW_020869062.1_247000	2	0.00590809	0.075
NW_020871100.1_354810	6	0.00593867	0.0833333
NW_020868913.1_65569	2	0.00599257	0.1375
NW_020870593.1_334140	5	0.00600209	0.3625
NW_020872643.1_152793	8	0.00604887	0.170833
NW_020872520.1_231384	8	0.00605449	0.1625
NW_020868938.1_501549	2	0.00607014	0.104167
NW_020871024.1_278848	6	0.00610463	0.1125
NW_020868508.1_41167	1	0.00616239	0.141667
NW_020870699.1_923108	5	0.0061813	0.233333
NW_020869889.1_484455	4	0.00631048	0.0791667
NW_020870026.1_2372297	4	0.00633366	0.204167
NW_020870988.1_978401	6	0.00635564	0.291667
NW_020872369.1_87124	7	0.0063626	0.479167
NW_020868667.1_157931	1	0.00638375	0.108333
NW_020872717.1_480474	9	0.00646547	0.0958333
NW_020871007.1_593373	6	0.00647134	0.0833333
NW_020870553.1_166588	5	0.00647191	0.120833
NW_020869390.1_246102	3	0.00649103	0.0166667
NW_020870533.1_427323	5	0.00653859	0.0958333
NW_020870391.1_425848	5	0.00656325	0.229167
NW_020872608.1_555961	8	0.00656898	0.175
NW_020868490.1_111196	1	0.0065746	0.454167
NW_020870021.1_34805	4	0.00658107	0.2625
NW_020872202.1_54994	7	0.00664123	0.433333
NW_020870384.1_187667	5	0.00673947	0.441667
NW_020870508.1_10427	5	0.0067874	0.0166667
NW_020870097.1_634656	4	0.00684972	0.225
NW_020871094.1_1175459	6	0.00706155	0.3875
NW_020869103.1_739626	2	0.00708836	0.1625
NW_020870370.1_292502	5	0.00710906	0.2
NW_020871382.1_335513	6	0.00714079	0.15
NW_020869169.1_489246	2	0.00720911	0.258333
NW_020870957.1_253733	6	0.00722051	0.283333
NW_020872925.1_67258	9	0.00723138	0.0666667
NW_020870701.1_79299	5	0.007232	0.258333
NW_020868792.1_649402	1	0.00729137	0.433333
NW_020871158.1_234531	6	0.00730996	0.145833
NW_020870724.1_513595	5	0.00735133	0.0833333
NW_020872936.1_242910	9	0.00737502	0.0416667
NW_020869444.1_322666	3	0.00739144	0.166667
c105519_g1_1549	9	0.00740443	0.0583333
NW_020870591.1_72341	5	0.00741075	0.0958333
NW_020870536.1_31194	5	0.0074238	0.0791667
NW_020871044.1_617209	6	0.0074238	0.0791667
NW_020869247.1_261014	2	0.00743279	0.116667
NW_020869123.1_81148	2	0.00745035	0.0916667
NW_020869690.1_4371	3	0.00746375	0.170833
NW_020870219.1_1334267	4	0.00748197	0.1875
NW_020870665.1_134971	5	0.00749654	0.125
NW_020872853.1_80105	9	0.00752163	0.108333
NW_020868737.1_89968	1	0.00755754	0.320833
NW_020870068.1_49890	4	0.00756736	0.0541667

## Sheet: Blink
SNP	SEQ	P-value	MAF
NW_020872338.1_225382	7	1.29e-08	0.225
NW_020872541.1_863289	8	5.45e-08	0.0458333
NW_020870588.1_80107	5	4.93e-05	0.0833333
NW_020869736.1_178203	3	0.00012799	0.229167
NW_020872430.1_204264	7	0.000164701	0.195833
NW_020870419.1_853232	5	0.000185695	0.441667
NW_020869901.1_97136	4	0.000210047	0.1
NW_020869107.1_517855	2	0.000210705	0.0833333
NW_020870342.1_276581	5	0.000224473	0.125
NW_020870301.1_411982	5	0.000280814	0.229167
NW_020869181.1_527302	2	0.000399454	0.133333
NW_020870593.1_334140	5	0.000424244	0.0625
NW_020869660.1_1590169	3	0.000445934	0.3125
NW_020872463.1_757021	7	0.000449783	0.0875
NW_020869786.1_137151	3	0.000518895	0.175
NW_020868691.1_225753	1	0.000521766	0.05
NW_020872838.1_1593	9	0.000580297	0.225
NW_020868671.1_567075	1	0.000587915	0.4125
NW_020871005.1_16029	6	0.000648066	0.0833333
NW_020871000.1_227175	6	0.000675864	0.233333
NW_020869906.1_166191	4	0.00068693	0.0833333
NW_020871095.1_140062	6	0.000700521	0.2125
NW_020872443.1_399431	7	0.000706893	0.0833333
NW_020868608.1_198653	1	0.000737269	0.0791667
NW_020869185.1_378465	2	0.000739686	0.229167
NW_020870864.1_414516	6	0.000769933	0.0916667
NW_020869301.1_182749	3	0.000772043	0.1
NW_020869927.1_327942	4	0.00083945	0.0708333
NW_020869308.1_872211	3	0.000839803	0.0541667
NW_020870373.1_284397	5	0.000893271	0.1625
NW_020869923.1_247472	4	0.00091377	0.0625
NW_020869262.1_776543	2	0.000945518	0.15
NW_020869613.1_169615	3	0.000951052	0.0458333
NW_020870195.1_67906	4	0.00101638	0.241667
NW_020869246.1_462010	2	0.00104571	0.0791667
NW_020868306.1_20334	1	0.00108092	0.0333333
NW_020870859.1_505318	6	0.00116106	0.0458333
NW_020868718.1_895759	1	0.00119756	0.170833
NW_020870342.1_393946	5	0.00120675	0.1375
NW_020872958.1_1030219	9	0.00124976	0.225
NW_020868455.1_623670	1	0.00129924	0.05
NW_020870859.1_251807	6	0.00131989	0.179167
NW_020868485.1_135162	1	0.00134897	0.2875
NW_020869758.1_283604	3	0.00145339	0.0208333
NW_020870645.1_763554	5	0.00151149	0.0166667
NW_020869960.1_65678	4	0.00155236	0.241667
NW_020870193.1_114284	4	0.00155309	0.270833
NW_020869390.1_330702	3	0.00155902	0.0916667
NW_020872423.1_104832	7	0.00158709	0.333333
NW_020868918.1_286801	2	0.00159067	0.341667
NW_020870886.1_843444	6	0.00160402	0.0708333
NW_020869330.1_647861	3	0.00161211	0.183333
NW_020870781.1_1152880	5	0.00165459	0.229167
NW_020869855.1_275485	4	0.00170184	0.0958333
NW_020872964.1_275440	9	0.00178262	0.4625
NW_020871336.1_224633	6	0.00182444	0.179167
NW_020871051.1_171708	6	0.00183485	0.1375
NW_020870184.1_122624	4	0.00185429	0.0666667
NW_020871094.1_1175459	6	0.00186345	0.3875
NW_020870499.1_230540	5	0.0020115	0.0291667
NW_020868804.1_445967	1	0.00202284	0.475
NW_020869223.1_463684	2	0.0020346	0.0291667
NW_020870859.1_227126	6	0.00208226	0.195833
NW_020869938.1_564148	4	0.00208925	0.3
NW_020869660.1_613757	3	0.00210734	0.466667
NW_020869401.1_126976	3	0.00216602	0.291667
NW_020870077.1_321032	4	0.00218782	0.0458333
NW_020872360.1_199872	7	0.00218782	0.0458333
NW_020868742.1_611279	1	0.0022001	0.0791667
NW_020869103.1_805766	2	0.00223358	0.0208333
NW_020869225.1_680515	2	0.00230886	0.15
NW_020870125.1_466768	4	0.00245536	0.233333
NW_020872778.1_153149	9	0.00261305	0.108333
NW_020870233.1_87868	4	0.00262006	0.0666667
NW_020869919.1_218969	4	0.00264954	0.15
NW_020871423.1_55996	6	0.00267001	0.254167
NW_020870274.1_491488	4	0.00268743	0.275
NW_020869901.1_140226	4	0.00270745	0.05
NW_020870555.1_370527	5	0.00270745	0.05
NW_020872873.1_237777	9	0.00270745	0.05
NW_020871526.1_106693	6	0.00271818	0.154167
NW_020872420.1_281045	7	0.00286718	0.408333
NW_020871663.1_967637	6	0.00287457	0.2625
NW_020871659.1_157105	6	0.00291382	0.175
NW_020868672.1_250201	1	0.00292983	0.154167
NW_020869938.1_483073	4	0.00295432	0.316667
NW_020869309.1_12713	3	0.00297837	0.4125
c100894_g1_586	9	0.00307016	0.308333
NW_020869103.1_739626	2	0.00323464	0.1625
NW_020869091.1_773636	2	0.00328897	0.108333
NW_020870575.1_212915	5	0.00329489	0.333333
NW_020868468.1_1256446	1	0.00334007	0.145833
NW_020870026.1_1832524	4	0.00335959	0.129167
NW_020868628.1_833220	1	0.0033743	0.333333
NW_020869623.1_309513	3	0.00340172	0.333333
NW_020868647.1_192315	1	0.00342052	0.191667
NW_020869408.1_4815	3	0.00350487	0.116667
NW_020870892.1_148351	6	0.00353365	0.175
NW_020872327.1_286291	7	0.00354396	0.0875
NW_020869431.1_285705	3	0.00355179	0.0166667
NW_020869758.1_61739	3	0.00355179	0.0166667
NW_020870529.1_129865	5	0.00356797	0.2375
NW_020869308.1_394439	3	0.00359997	0.104167
NW_020870401.1_155809	5	0.00365833	0.245833
NW_020868447.1_498236	1	0.00367409	0.116667
NW_020872853.1_122379	9	0.00380846	0.1125
NW_020869643.1_209132	3	0.00384143	0.254167
NW_020870026.1_1933821	4	0.0038418	0.1375
NW_020872459.1_133522	7	0.00386288	0.191667
NW_020870050.1_18455	4	0.00388382	0.141667
NW_020872035.1_3669	7	0.00389618	0.333333
NW_020872178.1_229733	7	0.00391246	0.15
NW_020869526.1_279287	3	0.00398229	0.0333333
NW_020870421.1_62459	5	0.00398688	0.4375
NW_020868569.1_520983	1	0.00408729	0.1875
NW_020868913.1_700230	2	0.00413961	0.0166667
NW_020869148.1_697363	2	0.00414745	0.175
NW_020869680.1_124511	3	0.00419046	0.0875
NW_020868571.1_139657	1	0.00424568	0.391667
NW_020869746.1_93455	3	0.00424697	0.0833333
NW_020869484.1_608859	3	0.00425548	0.0291667
NW_020869943.1_179454	4	0.00425773	0.25
NW_020872592.1_192447	8	0.00429313	0.104167
NW_020869184.1_810277	2	0.00432934	0.1375
NW_020868340.1_84487	1	0.00438139	0.0166667
NW_020869618.1_25350	3	0.00438139	0.0166667
NW_020871617.1_43148	6	0.00448533	0.1
NW_020871030.1_137216	6	0.00448895	0.3625
NW_020870202.1_345040	4	0.00449897	0.05
NW_020869647.1_157859	3	0.00452884	0.0375
NW_020870026.1_1799758	4	0.00452884	0.0375
NW_020870612.1_81562	5	0.00452884	0.0375
NW_020871134.1_552278	6	0.00452884	0.0375
NW_020872248.1_193232	7	0.00452884	0.0375
NW_020872797.1_177916	9	0.00464689	0.3125
NW_020869783.1_582383	3	0.00470404	0.5
NW_020869557.1_182391	3	0.00475448	0.483333
NW_020870106.1_1288753	4	0.00479713	0.179167
NW_020870445.1_2745	5	0.00492057	0.358333
NW_020869017.1_240355	2	0.00495603	0.1875
NW_020871848.1_610322	7	0.00500842	0.391667
NW_020869562.1_505341	3	0.00501022	0.329167
NW_020868605.1_325350	1	0.00501023	0.0416667
NW_020869557.1_449044	3	0.0050236	0.1875
NW_020871770.1_82140	7	0.00511053	0.129167
NW_020871100.1_109491	6	0.00511684	0.15
NW_020869402.1_248009	3	0.00512515	0.208333
NW_020869959.1_254533	4	0.0052278	0.270833
NW_020868500.1_8328	1	0.00524551	0.0291667
NW_020870803.1_127037	5	0.00527073	0.125
NW_020868628.1_455458	1	0.0053165	0.366667
NW_020869298.1_247594	3	0.00538167	0.4375
NW_020870753.1_908556	5	0.00544491	0.1
NW_020870520.1_349968	5	0.00547389	0.116667
NW_020872879.1_121224	9	0.00549516	0.0166667
NW_020869198.1_197422	2	0.00552119	0.0916667
NW_020868506.1_649073	1	0.00556633	0.354167
NW_020872683.1_279689	8	0.00567739	0.0333333
NW_020872031.1_47395	7	0.00569852	0.0125
NW_020868895.1_812125	2	0.00570947	0.120833
NW_020872666.1_104520	8	0.00572284	0.158333
NW_020868460.1_162561	1	0.00575181	0.0208333
NW_020871771.1_401328	7	0.00580152	0.1625
NW_020871926.1_198207	7	0.00586287	0.0583333
NW_020869341.1_86071	3	0.00586792	0.0458333
NW_020870074.1_5605	4	0.00586792	0.0458333
NW_020872799.1_19191	9	0.00586792	0.0458333
NW_020868946.1_288434	2	0.00599265	0.108333
NW_020872317.1_280985	7	0.00601834	0.1
NW_020868961.1_495865	2	0.00616663	0.104167
NW_020872537.1_229104	8	0.00619941	0.1125
NW_020872250.1_22667	7	0.00621343	0.0125
NW_020868628.1_881795	1	0.00631485	0.316667
NW_020868382.1_130662	1	0.00632999	0.0875
NW_020870702.1_124918	5	0.00639386	0.175
NW_020870194.1_137084	4	0.00639652	0.0708333
NW_020870384.1_187667	5	0.00639679	0.441667
NW_020872374.1_198133	7	0.00639829	0.0583333
NW_020872404.1_38953	7	0.00642329	0.25
NW_020870729.1_145274	5	0.00643267	0.141667
NW_020869445.1_370772	3	0.00652871	0.0166667
NW_020870106.1_1037660	4	0.00665147	0.0958333
NW_020868617.1_98159	1	0.00667662	0.191667
NW_020871424.1_139761	6	0.00669387	0.225
NW_020868293.1_177288	1	0.00669424	0.3125
NW_020869220.1_14021	2	0.00675244	0.104167
NW_020872698.1_241848	8	0.00681728	0.3875
NW_020869739.1_322292	3	0.00682876	0.0375
NW_020868335.1_458685	1	0.00686874	0.116667
NW_020868515.1_240965	1	0.00692649	0.0916667
NW_020870116.1_528961	4	0.00693614	0.1375
NW_020868918.1_1053493	2	0.00697629	0.191667
NW_020872178.1_49294	7	0.00707728	0.304167
NW_020872622.1_538564	8	0.00718137	0.275
NW_020869753.1_452961	3	0.00719019	0.475
NW_020870146.1_337778	4	0.00720199	0.391667
NW_020868515.1_14418	1	0.00727604	0.183333
NW_020868440.1_215818	1	0.00729393	0.15
NW_020868350.1_692077	1	0.0072945	0.108333
NW_020868628.1_858312	1	0.00733879	0.3125

## Sheet: MLM
SNP	SEQ	P-value	MAF
NW_020872338.1_225382	7	6.95e-06	0.225
NW_020872541.1_863289	8	5.47e-05	0.0458333
NW_020871100.1_109491	6	7.74e-05	0.15
NW_020870039.1_210539	4	9.5e-05	0.0458333
NW_020870373.1_284397	5	0.000189638	0.0708333
NW_020872327.1_286291	7	0.00027182	0.0875
NW_020869855.1_275485	4	0.000272998	0.104167
NW_020871000.1_227175	6	0.000279905	0.233333
NW_020870788.1_147143	5	0.000317499	0.425
NW_020869694.1_555099	3	0.000535893	0.495833
NW_020869290.1_724189	2	0.000643001	0.1375
NW_020868314.1_61596	1	0.000687962	0.179167
NW_020872009.1_5595	7	0.000716767	0.4125
NW_020869500.1_362532	3	0.000734752	0.0125
NW_020870520.1_246454	5	0.000791479	0.204167
NW_020870721.1_418099	5	0.000814898	0.170833
NW_020868608.1_198653	1	0.000846283	0.0791667
NW_020872838.1_573893	9	0.000916427	0.383333
NW_020869246.1_462010	2	0.00106818	0.0791667
NW_020870192.1_189427	4	0.00119812	0.333333
NW_020870873.1_876746	6	0.00119939	0.445833
NW_020871003.1_479005	6	0.00129599	0.0166667
NW_020872683.1_279689	8	0.00131755	0.0333333
NW_020868857.1_1134750	2	0.00139626	0.129167
NW_020870575.1_212915	5	0.00147617	0.333333
NW_020872494.1_244292	7	0.00155906	0.225
NW_020871049.1_299854	6	0.00157397	0.4375
NW_020869014.1_267474	2	0.00157946	0.1125
NW_020868608.1_222844	1	0.00169151	0.216667
NW_020869613.1_169615	3	0.00171865	0.0458333
NW_020870555.1_272791	5	0.00186706	0.141667
NW_020869133.1_1358970	2	0.00191602	0.491667
NW_020870172.1_193652	4	0.00193011	0.329167
NW_020870289.1_362947	4	0.00196046	0.495833
NW_020872504.1_162356	7	0.00196467	0.0125
NW_020870536.1_31194	5	0.00197734	0.0791667
NW_020871044.1_617209	6	0.00197734	0.0791667
NW_020868458.1_514620	1	0.00202753	0.141667
NW_020868942.1_116501	2	0.00211358	0.320833
NW_020871250.1_127300	6	0.00215472	0.1
NW_020872372.1_188680	7	0.00236328	0.0958333
NW_020868886.1_1206267	2	0.00245253	0.145833
NW_020869082.1_160405	2	0.00246476	0.179167
NW_020872479.1_7891	7	0.00246904	0.35
NW_020871035.1_468003	6	0.0024724	0.2375
NW_020870367.1_142522	5	0.00247802	0.345833
NW_020869844.1_608455	4	0.00250939	0.275
NW_020871011.1_271718	6	0.00264343	0.0916667
NW_020868380.1_192379	1	0.00265733	0.179167
NW_020868857.1_1234078	2	0.00267385	0.1625
NW_020869770.1_695385	3	0.00269475	0.0458333
NW_020870037.1_290851	4	0.00279186	0.483333
NW_020869507.1_730100	3	0.00284771	0.258333
NW_020871321.1_321145	6	0.00294533	0.320833
NW_020868391.1_623405	1	0.00295837	0.166667
NW_020868305.1_495285	1	0.00296642	0.3625
NW_020869103.1_805766	2	0.00303717	0.0208333
NW_020869497.1_515285	3	0.00304402	0.220833
NW_020869289.1_430730	2	0.00305502	0.1375
NW_020869856.1_82678	4	0.00311149	0.166667
NW_020869262.1_876904	2	0.00311838	0.116667
NW_020870194.1_137084	4	0.00316454	0.0708333
NW_020872720.1_781547	9	0.00322439	0.108333
NW_020872890.1_309292	9	0.00325095	0.104167
NW_020869318.1_447983	3	0.00325286	0.1625
NW_020870609.1_186348	5	0.0032857	0.316667
NW_020870219.1_1334267	4	0.00331411	0.1875
NW_020869003.1_177582	2	0.00337605	0.0458333
NW_020871040.1_27155	6	0.00337784	0.0833333
NW_020869858.1_1385529	4	0.00340622	0.0708333
NW_020871588.1_1063241	6	0.0034165	0.304167
NW_020868952.1_127642	2	0.00342367	0.195833
NW_020869820.1_202562	4	0.00344665	0.0541667
NW_020871044.1_308103	6	0.00356597	0.25
NW_020869727.1_271682	3	0.00356794	0.0333333
NW_020868922.1_101226	2	0.00357326	0.15
NW_020868506.1_649073	1	0.00360955	0.354167
NW_020872931.1_267946	9	0.00365209	0.279167
NW_020871230.1_11616	6	0.00365758	0.416667
NW_020868748.1_194324	1	0.00367927	0.279167
NW_020868629.1_22829	1	0.00369362	0.1
NW_020870997.1_418455	6	0.00378359	0.216667
NW_020869079.1_600689	2	0.00385713	0.1875
NW_020872890.1_520013	9	0.0038656	0.108333
NW_020869738.1_1020338	3	0.00387272	0.425
NW_020869500.1_57087	3	0.00387743	0.129167
NW_020870023.1_187079	4	0.00388801	0.0458333
NW_020868318.1_291848	1	0.00395008	0.170833
NW_020872570.1_73536	8	0.0039906	0.1625
NW_020870695.1_227775	5	0.00407769	0.108333
NW_020869806.1_353169	3	0.00416427	0.0416667
NW_020868462.1_29606	1	0.00416961	0.0708333
NW_020871382.1_302704	6	0.00420077	0.108333
NW_020870185.1_1050342	4	0.00421062	0.1125
NW_020869098.1_299986	2	0.00422791	0.075
NW_020870341.1_169184	5	0.00425189	0.283333
NW_020869625.1_359817	3	0.00426481	0.275
NW_020869992.1_107814	4	0.00427947	0.3625
NW_020868346.1_149993	1	0.00428828	0.495833
NW_020869406.1_368789	3	0.00433423	0.208333
NW_020869003.1_455212	2	0.00437027	0.220833
NW_020870974.1_366876	6	0.00437259	0.341667
NW_020872432.1_688424	7	0.0043743	0.25
NW_020872939.1_571903	9	0.0043771	0.0583333
NW_020872939.1_581736	9	0.0043771	0.0583333
NW_020870527.1_664757	5	0.00442042	0.1125
NW_020868840.1_637603	2	0.00442168	0.0625
NW_020868640.1_974853	1	0.00442985	0.108333
NW_020869079.1_600646	2	0.00443303	0.191667
NW_020870593.1_334140	5	0.00450248	0.129167
NW_020870425.1_545634	5	0.00455252	0.254167
NW_020869103.1_918939	2	0.00458057	0.0875
NW_020868459.1_797267	1	0.00460604	0.2625
NW_020870739.1_405396	5	0.00479485	0.420833
NW_020868370.1_305059	1	0.00482437	0.258333
NW_020870651.1_766447	5	0.00483192	0.175
NW_020870630.1_652408	5	0.0048351	0.25
NW_020869691.1_10138	3	0.0048575	0.25
NW_020869344.1_178257	3	0.00489075	0.166667
NW_020869587.1_326719	3	0.00489939	0.133333
NW_020872489.1_372095	7	0.00493954	0.279167
NW_020870515.1_246520	5	0.00495181	0.345833
NW_020870515.1_267313	5	0.00495181	0.345833
NW_020869482.1_445898	3	0.00495279	0.454167
NW_020869406.1_232245	3	0.00500714	0.25
NW_020870664.1_256327	5	0.00500767	0.170833
NW_020870225.1_48828	4	0.00501514	0.129167
NW_020868880.1_1048264	2	0.00504872	0.283333
NW_020868305.1_882475	1	0.00507951	0.05
NW_020872000.1_142109	7	0.00509255	0.0625
NW_020872661.1_504117	8	0.00511387	0.3125
NW_020869010.1_157986	2	0.00511522	0.2375
NW_020871723.1_182498	6	0.00524332	0.170833
NW_020871999.1_195662	7	0.00528536	0.154167
NW_020869504.1_718243	3	0.00529749	0.158333
NW_020868607.1_667591	1	0.00531276	0.3375
NW_020872940.1_32526	9	0.00536669	0.1625
NW_020870300.1_417618	5	0.00540502	0.241667
NW_020871000.1_167576	6	0.00540518	0.420833
NW_020868479.1_77926	1	0.00556423	0.320833
NW_020868613.1_558728	1	0.0056193	0.1125
NW_020871778.1_139832	7	0.00564126	0.204167
NW_020870531.1_137487	5	0.00572538	0.483333
NW_020869868.1_265617	4	0.00573013	0.0791667
NW_020872479.1_32035	7	0.00573729	0.341667
NW_020872294.1_31515	7	0.00576217	0.220833
NW_020872673.1_201991	8	0.00577548	0.216667
NW_020870043.1_8664	4	0.00578284	0.0791667
NW_020868527.1_6935	1	0.00578824	0.408333
NW_020869444.1_239148	3	0.00581278	0.325
NW_020868489.1_273098	1	0.00588998	0.0541667
NW_020871215.1_999815	6	0.00590302	0.108333
NW_020868317.1_13701	1	0.0059235	0.241667
NW_020869501.1_97987	3	0.00612829	0.466667
NW_020869308.1_1404980	3	0.00616899	0.116667
NW_020872510.1_718331	7	0.00619477	0.370833
NW_020869428.1_468476	3	0.0062769	0.0916667
NW_020872855.1_309331	9	0.00632599	0.125
NW_020872665.1_397120	8	0.00635131	0.2
NW_020870242.1_14423	4	0.00640461	0.395833
NW_020869959.1_254533	4	0.00642967	0.270833
NW_020870700.1_32517	5	0.00643621	0.479167
NW_020870610.1_40918	5	0.00652118	0.370833
NW_020869839.1_127826	4	0.00655304	0.0166667
NW_020872598.1_116754	8	0.00655304	0.0166667
NW_020870048.1_856912	4	0.00660606	0.370833
NW_020870494.1_33426	5	0.00663176	0.320833
NW_020868447.1_171391	1	0.00664088	0.0833333
NW_020869295.1_615061	3	0.00664422	0.4
NW_020870664.1_704677	5	0.00667838	0.395833
NW_020870739.1_344015	5	0.00668607	0.1125
NW_020871237.1_25374	6	0.00673227	0.25
NW_020869936.1_295211	4	0.00676583	0.0916667
NW_020869562.1_750545	3	0.00679682	0.233333
NW_020869147.1_1908654	2	0.00683262	0.341667
NW_020872701.1_902459	9	0.00683619	0.0666667
NW_020872140.1_459528	7	0.00685055	0.2
NW_020869922.1_398322	4	0.00685696	0.1
NW_020871004.1_130800	6	0.00694506	0.0666667
NW_020870206.1_77638	4	0.00702836	0.125
NW_020872632.1_204564	8	0.00704775	0.0875
NW_020870628.1_773046	5	0.00707467	0.466667
NW_020870054.1_46743	4	0.00708702	0.129167
NW_020868479.1_83615	1	0.00725472	0.3
NW_020871062.1_914984	6	0.00729677	0.025
NW_020871506.1_199324	6	0.0073609	0.470833
NW_020871382.1_335513	6	0.00738884	0.15
NW_020869456.1_252418	3	0.00743696	0.0416667
NW_020870425.1_520359	5	0.00746795	0.258333
NW_020871765.1_150280	6	0.00748067	0.108333
NW_020871290.1_40285	6	0.00749971	0.0708333
NW_020869263.1_450979	2	0.0075283	0.133333
NW_020870340.1_54274	5	0.0075283	0.133333
NW_020870340.1_83678	5	0.0075283	0.133333
NW_020868923.1_552990	2	0.00754199	0.429167
NW_020868292.1_247230	1	0.00759794	0.475
NW_020870055.1_637943	4	0.00771116	0.175
NW_020869864.1_512954	4	0.00775277	0.158333
NW_020871514.1_363762	6	0.00778251	0.2
NW_020872452.1_315046	7	0.0078023	0.245833
